# Supplementary material
Source: Springer Nature journal article supplement (https://www.springermedizin.de/resource/supplementary/12887_2010_401_MOESM1_ESM.pdf/9475034)

PCT (ng/ml)

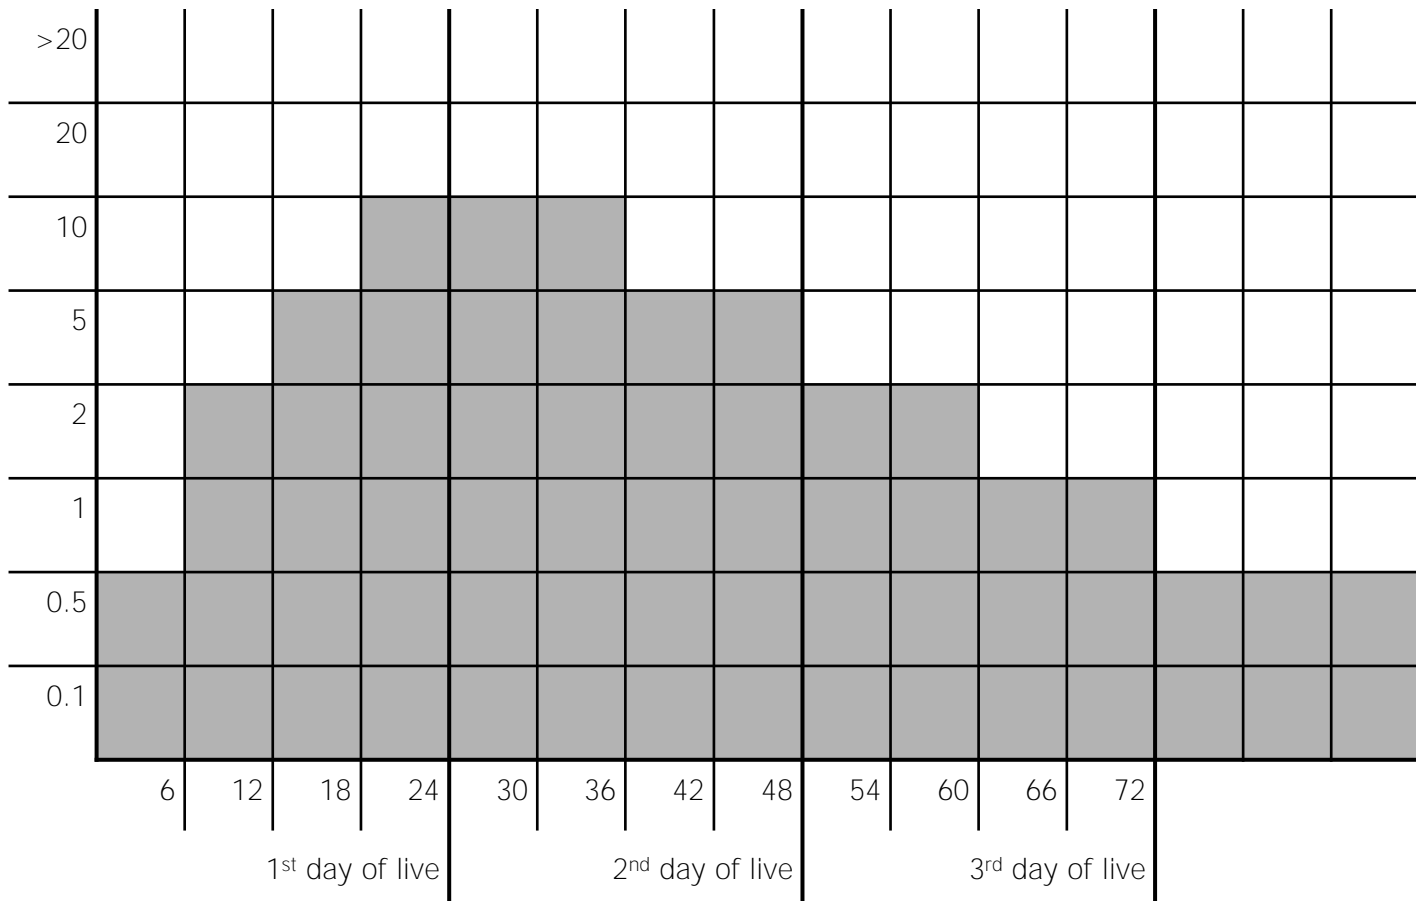

Supplement: MOESM1 [file 9475034]
